# Supplementary material for: Spatiotemporal variability of CO 2 , N 2 O and CH 4 fluxes from a semi-deciduous tropical forest soil in the Congo basin
Source: Copernicus journal article supplement (doi:10.5194/egusphere-2024-2346), 2024-08-14
Supplement: Supplementary file 1 [file egusphere-2024-2346-supplement.pdf]

## Supplementary Material

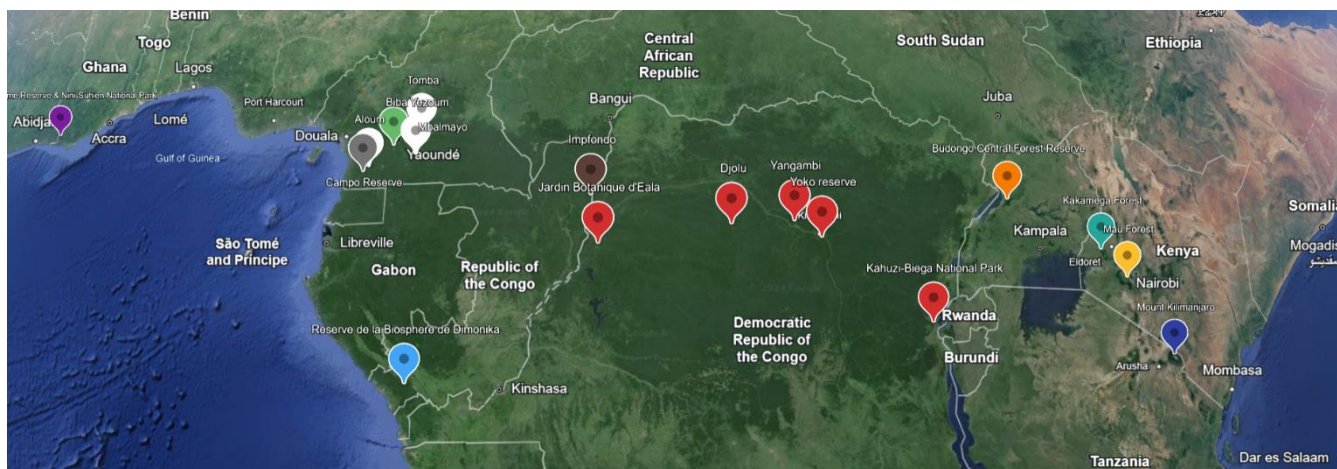

**Figure S1:** Different locations of studies which measured greenhouse gas fluxes of tropical forest soils in Central Africa. More information on the studies can be found in Table S1. Made using Google Earth 10.55.0.1 (Google, Landsat / Copernicus with data from SIO, NOAA, U.S. Navy, NGA, GEBCO, IBCAO) ©Google Earth

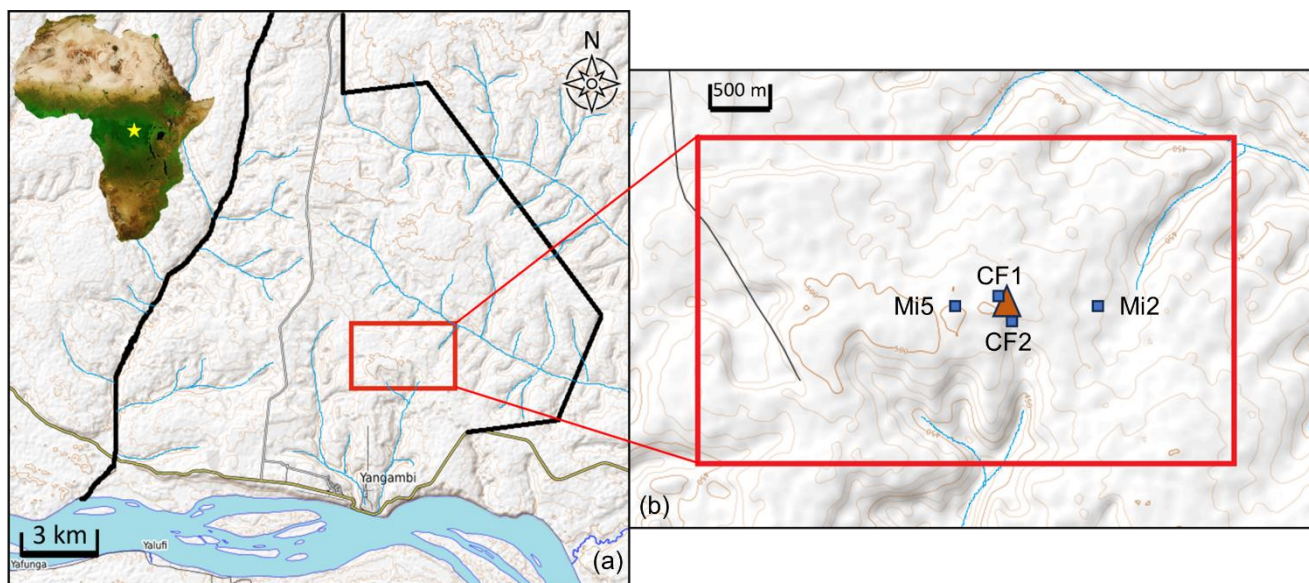

**Figure S2:** (a) Map of Yangambi with the CongoFlux climate site ( $0^{\circ}48'52.0''$  N  $24^{\circ}30'08.9''$  E) in the red square. (b) A close-up of the CongoFlux climate site with the triangle indicating the location of the flux tower and the squares indicating the locations of the 4 sampling plots (CF1, CF2, Mi2 and Mi5). Made using base map from OpenTopoMap.org (OpenStreetMap and SRTM)

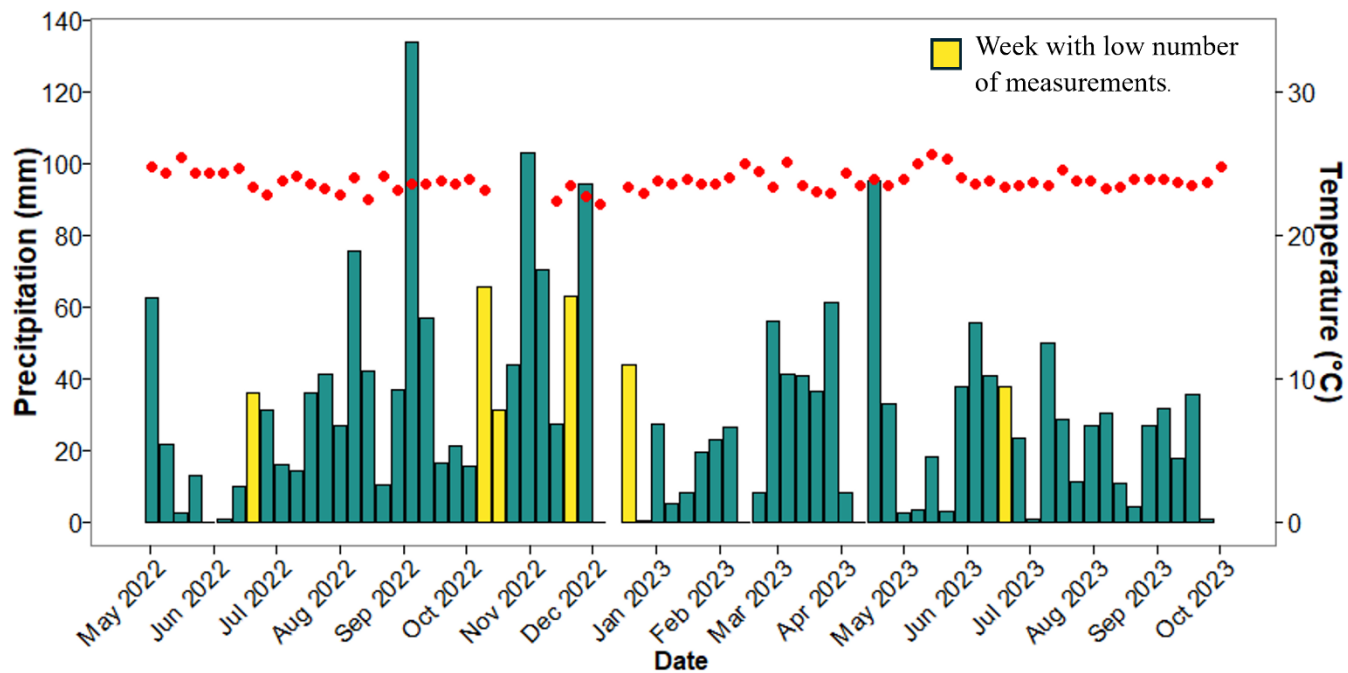

Figure S3: The bars showing the total precipitation (mm) per week and in red dotted line, the averaged air temperature per week (°C) at the CongoFlux site (0°48'52.0" N 24°30'08.9" E).

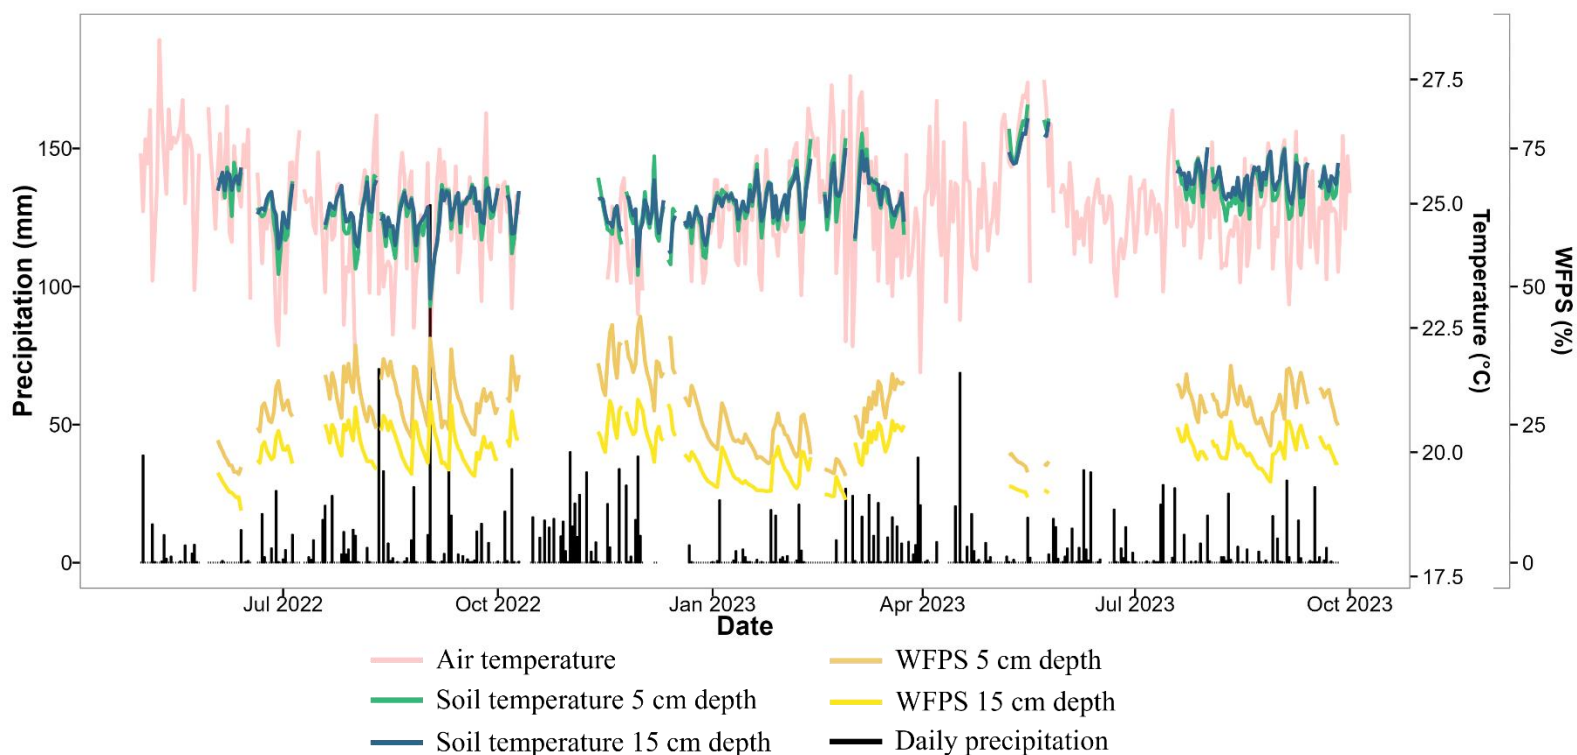

Figure S4: Water filled pore space (WFPS, %) and Soil Temperature (°C) daily average of the nine chamber locations at 5 cm and at 15 cm depth with daily precipitation (mm) and daily air temperature (°C).

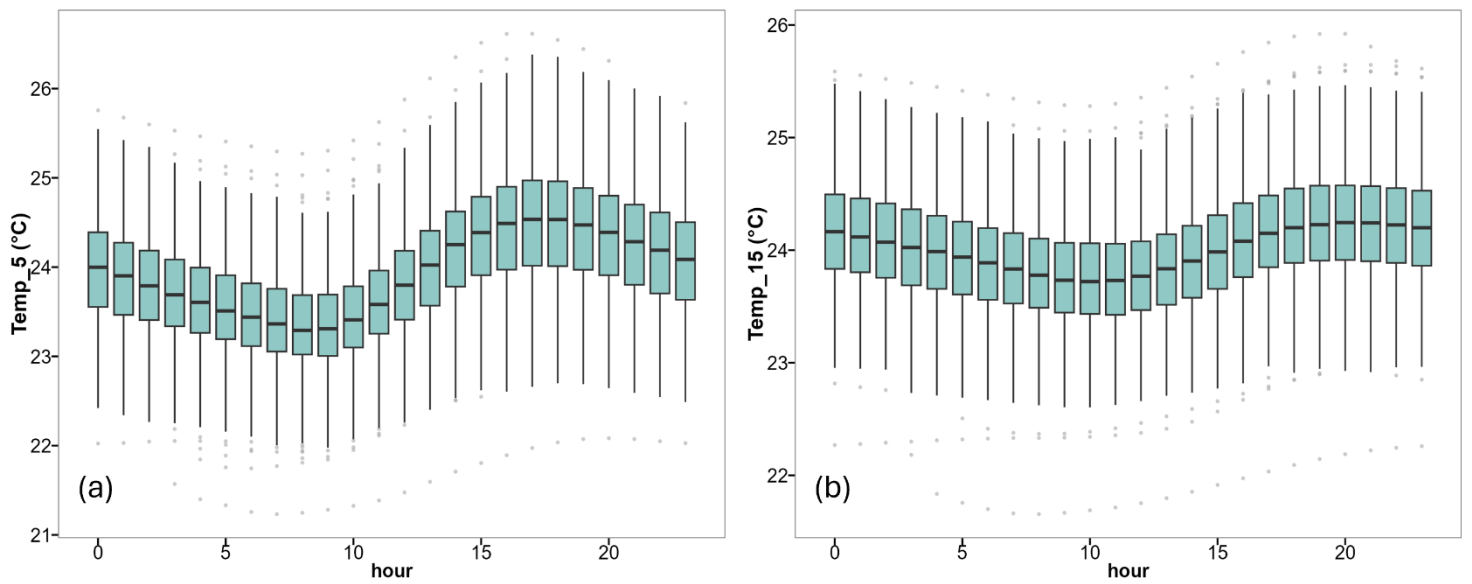

**Figure S5: Diel cycle of the average of all nine dynamic chamber locations for a) soil temperature ( $Temp$ , °C) at 5 cm, and b) 15 cm depth. The boxplots show the median with the bold black line, the lower and upper hinges correspond to the 25<sup>th</sup> and 75<sup>th</sup> percentiles and the upper (lower) whisker extends from the hinge to the largest (smallest) value no further than  $1.5 * \text{inter-quartile range}$  from the hinge. Data beyond the end of the whiskers are considered outlying points and are plotted individually.**

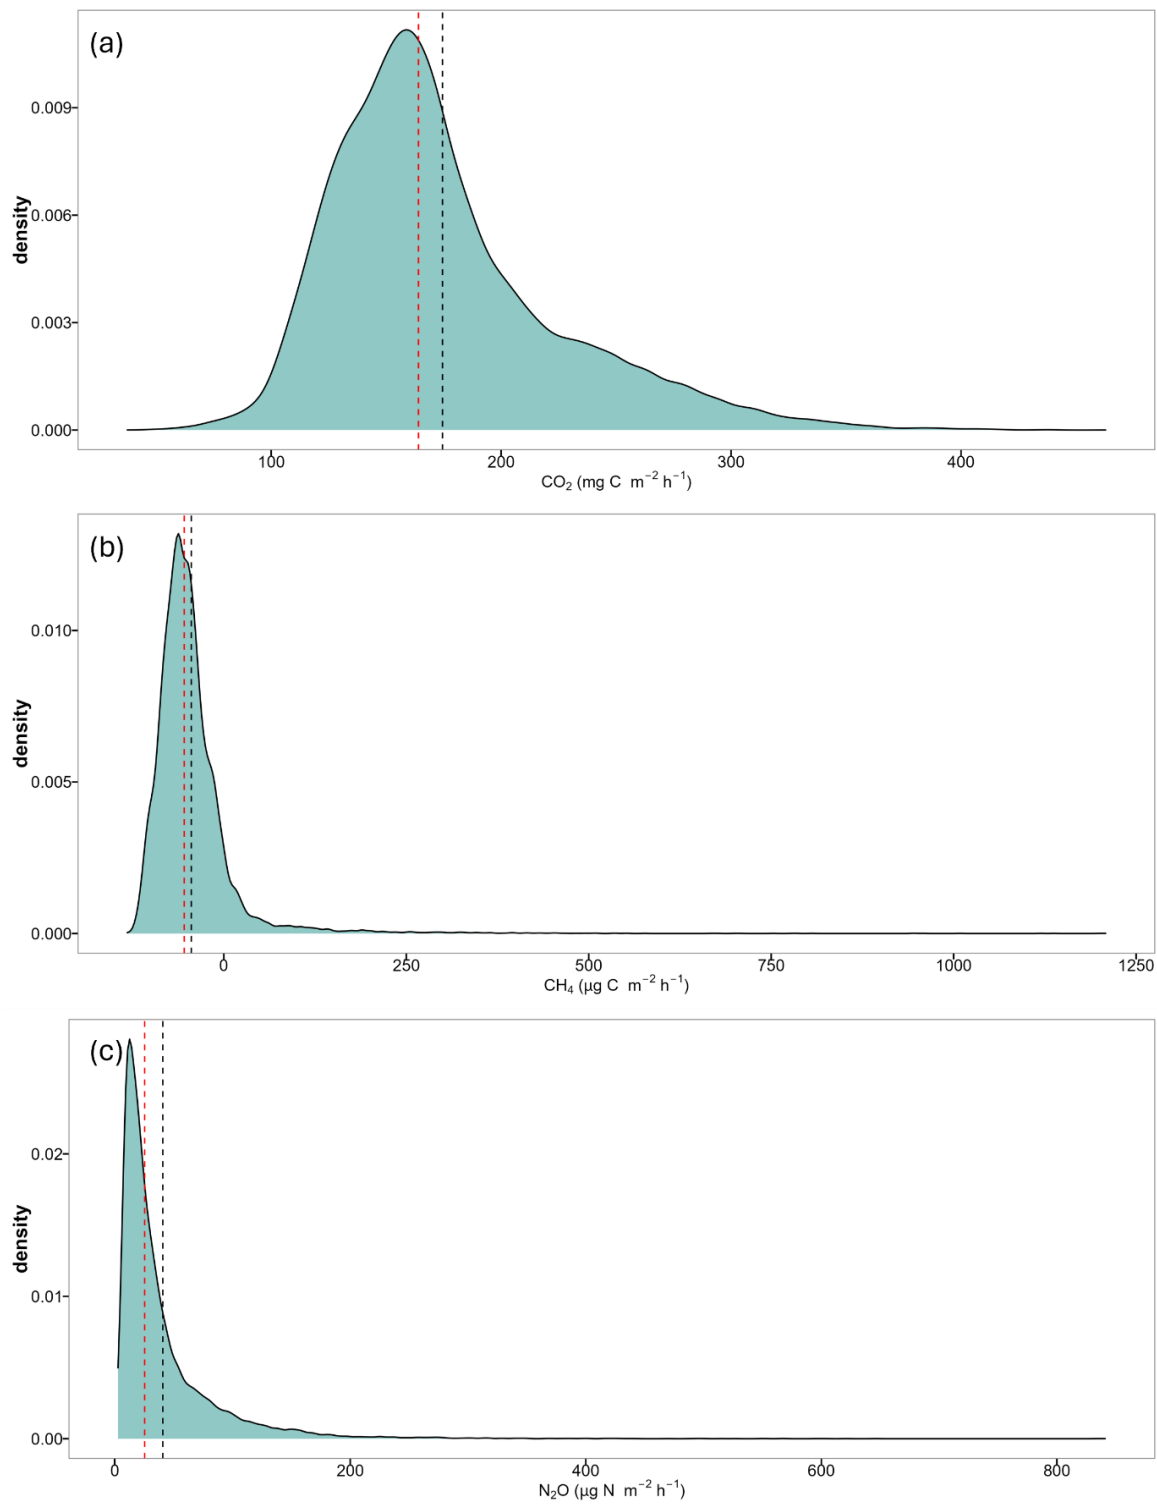

**Figure S6: Distribution of all flux measurements during the whole measuring period of all nine chambers with the mean value in black and the median value in red dashed line for a) CO<sub>2</sub> (mg C m<sup>-2</sup> h<sup>-1</sup>), b) CH<sub>4</sub> (μg C m<sup>-2</sup> h<sup>-1</sup>) and c) N<sub>2</sub>O (μg N m<sup>-2</sup> h<sup>-1</sup>).**

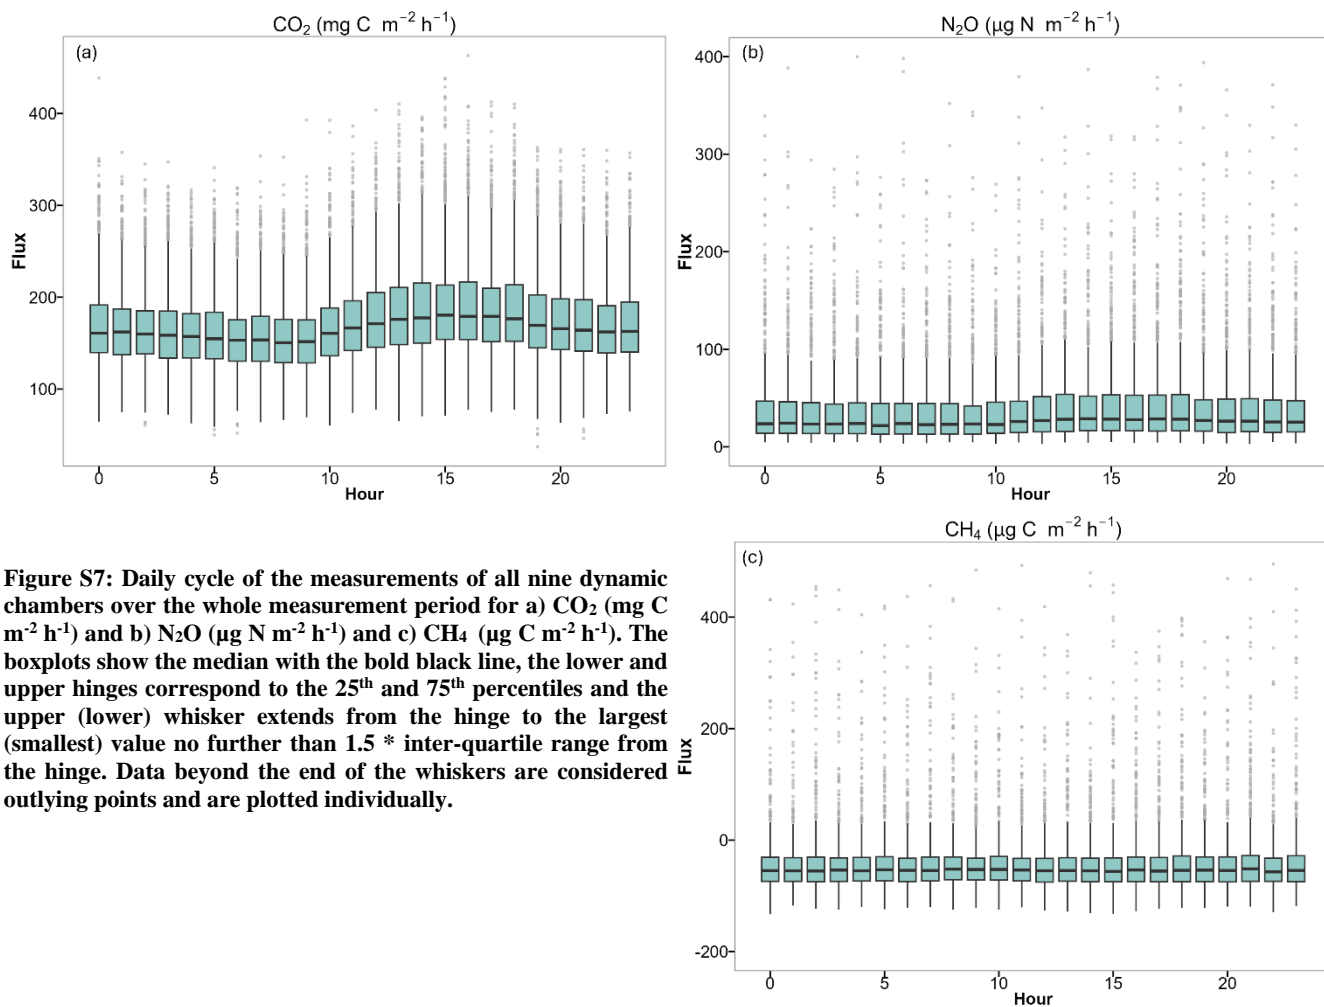

**Figure S7: Daily cycle of the measurements of all nine dynamic chambers over the whole measurement period for a) CO<sub>2</sub> (mg C m<sup>-2</sup> h<sup>-1</sup>) and b) N<sub>2</sub>O (µg N m<sup>-2</sup> h<sup>-1</sup>) and c) CH<sub>4</sub> (µg C m<sup>-2</sup> h<sup>-1</sup>). The boxplots show the median with the bold black line, the lower and upper hinges correspond to the 25<sup>th</sup> and 75<sup>th</sup> percentiles and the upper (lower) whisker extends from the hinge to the largest (smallest) value no further than 1.5 \* inter-quartile range from the hinge. Data beyond the end of the whiskers are considered outlying points and are plotted individually.**

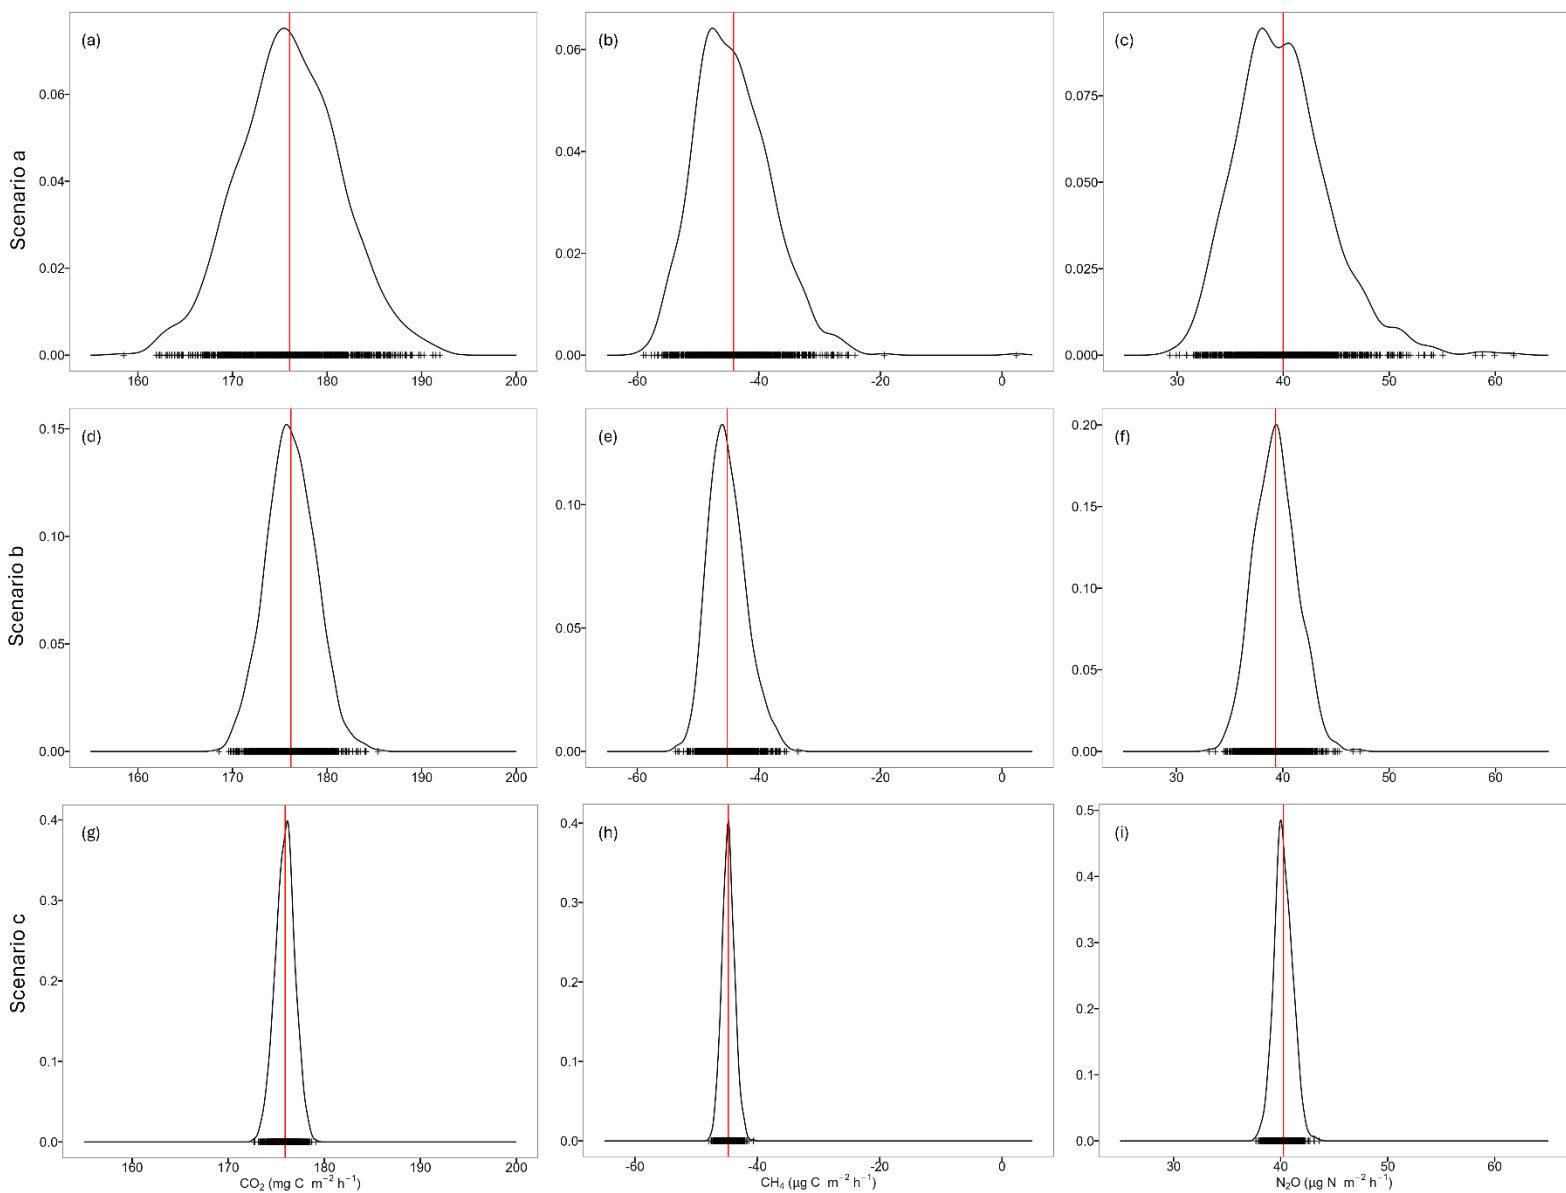

**Figure S8: The distributions of the 1000 greenhouse gas budgets of the three bootstrap scenarios for CO<sub>2</sub> (g C m<sup>-2</sup> h<sup>-1</sup>), CH<sub>4</sub> (mg C m<sup>-2</sup> h<sup>-1</sup>) and N<sub>2</sub>O (mg N m<sup>-2</sup> h<sup>-1</sup>). More information about the resampling procedure can be found in Table S10.**



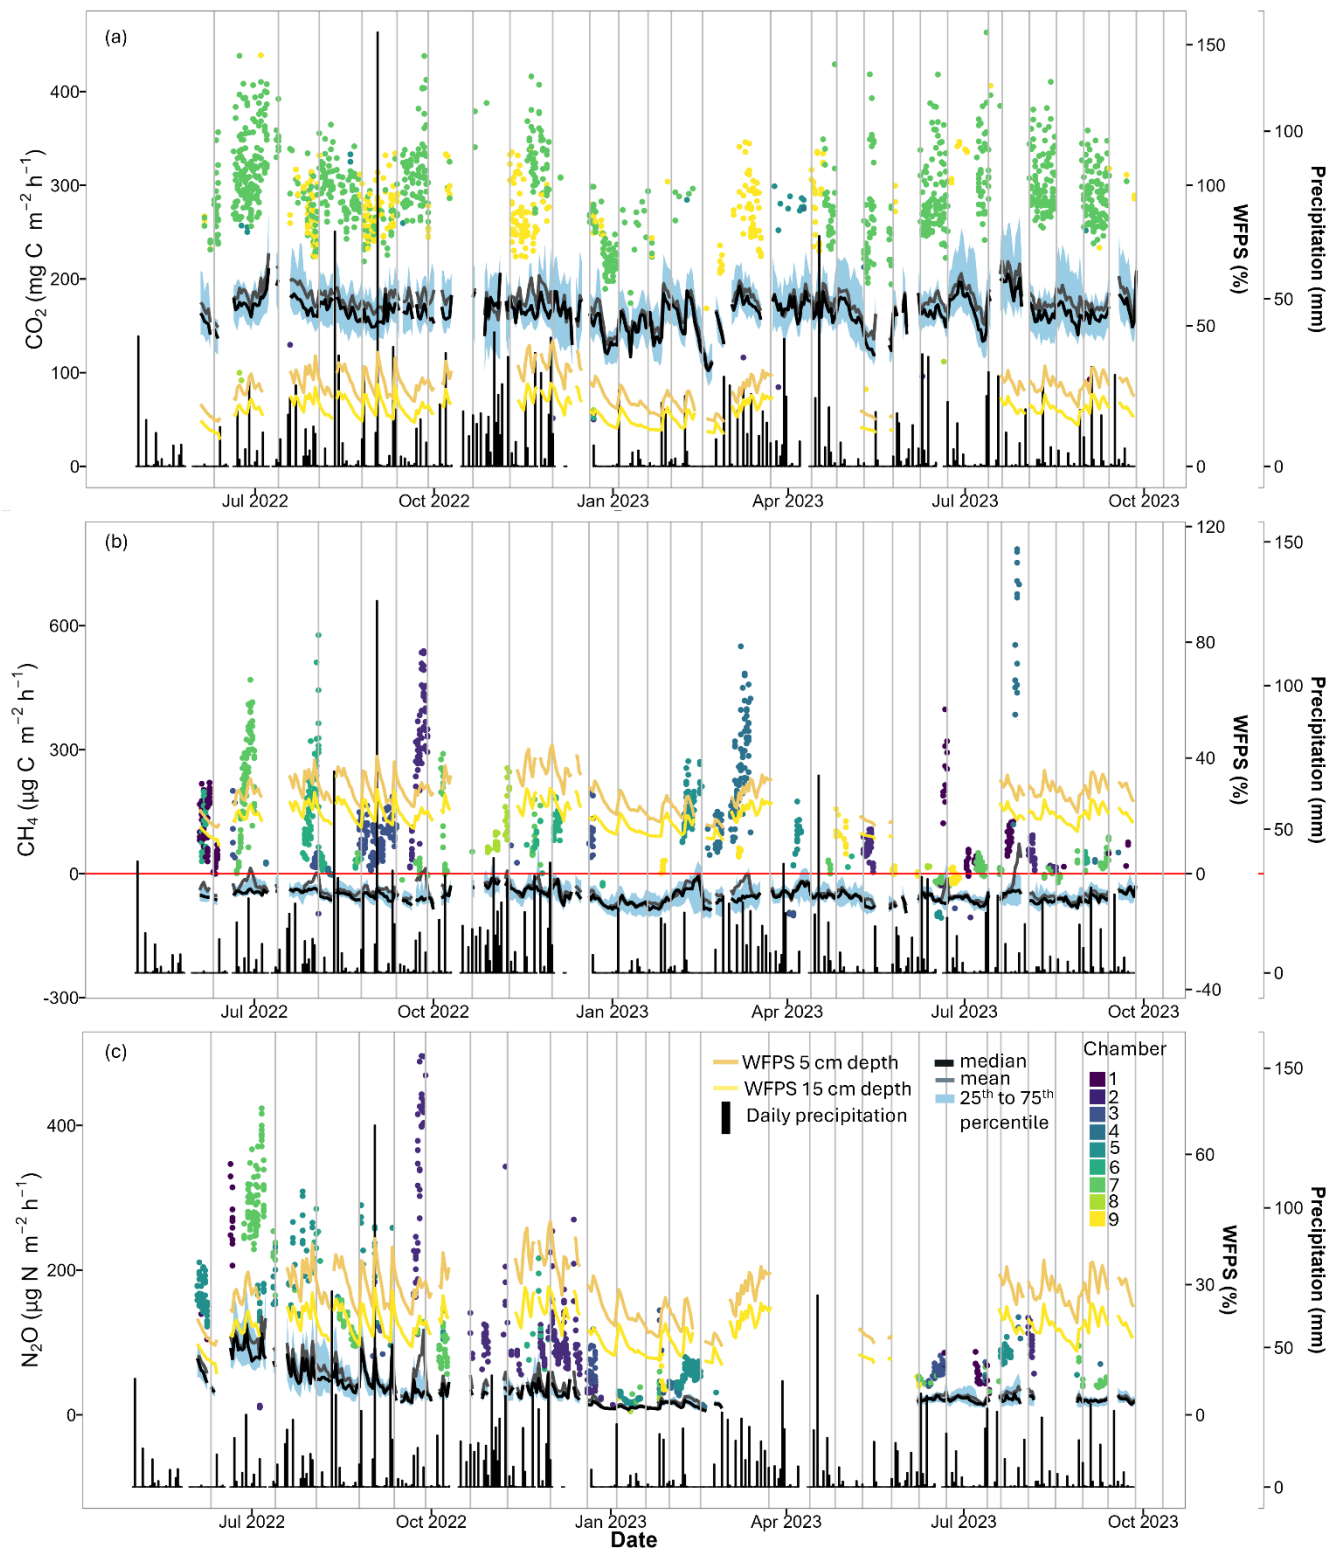

**Figure S9:** a) CO<sub>2</sub>, b) CH<sub>4</sub> and c) N<sub>2</sub>O fluxes of all nine chambers over the whole measuring period. In black are the daily median values, in grey the daily averages, in blue the 25<sup>th</sup> up to 75<sup>th</sup> quantile and the coloured points are outlier values. Outliers have a distance to the 25<sup>th</sup> or 75<sup>th</sup> quantile value that is larger than 1.5 times the interquartile distance. Each colour represents one chamber. Vertical grey lines depict days where the chambers were replaced from one collar to the other. Water filled pore space (WFPS, %) daily average of the nine chamber locations at 5 cm and at 15 cm depth with daily precipitation (mm).

**Table S1: Different studies which measured greenhouse gas fluxes of tropical forest soils in sub-Saharan Africa. Locations of the studies can be found on the map in Fig. S1.**

| Country  | Location                                                                                                                                                                                         | Research team              | Method                                                                                                           | Focus                             |
|----------|--------------------------------------------------------------------------------------------------------------------------------------------------------------------------------------------------|----------------------------|------------------------------------------------------------------------------------------------------------------|-----------------------------------|
| Kenya    |  Mau Forest Complex                                                                                             | Arias-Navarro et al. 2017a | Soil laboratory incubations for N <sub>2</sub> O                                                                 | Topography                        |
|          |                                                                                                                                                                                                  | Arias-Navarro et al. 2017b | Soil laboratory incubations for N <sub>2</sub> O and CO <sub>2</sub>                                             | Land use                          |
|          |                                                                                                                                                                                                  | Wanyama et al. 2018        | Manual static chamber for N <sub>2</sub> O                                                                       | Management intensity              |
|          |                                                                                                                                                                                                  | Wanyama et al. 2019        | Manual static chamber for CO <sub>2</sub> and CH <sub>4</sub>                                                    | Land use                          |
|          |  Kakamega Forest National Park                                                                                  | Werner et al. 2007         | Automated static chamber for CO <sub>2</sub> , CH <sub>4</sub> and N <sub>2</sub> O                              | Tropical Forest                   |
| DRC      |  Maringa Lopori-Wamba Landscape, Yangambi Biosphere Reserve, Yoko Forest Reserve, Jardino Botanique de Mbandaka | Barthel et al. 2022        | Manual static chamber for CH <sub>4</sub> and N <sub>2</sub> O                                                   | Montane, swamp and lowland forest |
|          |                                                                                                                                                                                                  | Baumgartner et al. 2020    | Manual static chamber for CO <sub>2</sub>                                                                        | Montane, swamp and lowland forest |
| Ghana    |  Ankasa Wildlife Protected Area                                                                               | Castaldi et al. 2013       | Manual static chamber for N <sub>2</sub> O                                                                       | Tropical forest                   |
|          |                                                                                                                                                                                                  | Castaldi et al. 2020       | Manual static chamber for CH <sub>4</sub>                                                                        | Tropical forest                   |
| Tanzania |  Mount Kilimanjaro                                                                                            | Gütlein et al. 2018        | Soil laboratory incubations and manual static chamber for CO <sub>2</sub> , CH <sub>4</sub> and N <sub>2</sub> O | Different ecosystems              |
| Cameroon |  Aloum, Biba Yezoum, Tomba                                                                                    | Iddris et al. 2020         | Manual static chamber for N <sub>2</sub> O                                                                       | Rain forest and Cacao agroforest  |
|          |  Campo-Ma'an                                                                                                  | Tchiofo Lontsi et al. 2020 | Manual static chamber for CO <sub>2</sub> , CH <sub>4</sub> and N <sub>2</sub> O                                 | Tropical forest                   |
|          |  Mbalmayo Forest Reserve                                                                                      | Macdonald et al. 1998      | Manual static chamber for CH <sub>4</sub>                                                                        | Termite mounds                    |



|                   |                                                                                                                     |                    |                                                                                  |                     |
|-------------------|---------------------------------------------------------------------------------------------------------------------|--------------------|----------------------------------------------------------------------------------|---------------------|
| Republic of Congo |  Dimonika                           | Serca et al. 1994  | Manual static chamber for N <sub>2</sub> O                                       | Tropical forest     |
|                   | Natural Park forest                                                                                                 |                    |                                                                                  |                     |
|                   |  Impfondo                          | Tathy et al. 1992  | Manual static chamber for CO <sub>2</sub> and CH <sub>4</sub>                    | Flooded forest      |
| Uganda            |  Budongo<br>Central Forest Reserve | Tamale et al. 2021 | Manual static chamber for CO <sub>2</sub> , CH <sub>4</sub> and N <sub>2</sub> O | Nutrient limitation |

**Table S2: The concentration of exchangeable basic cations calcium (Ca), potassium (K), magnesium (Mg) and Sodium (Na) and the cation exchange capacity (CEC), expressed as centimoles per kilogram of dry soil (cmol(+) kg<sup>-1</sup>), the pH values measured both in water (pH w) and in kaliumchloride (pH KCl), the nitrogen (N) and carbon (C) content expressed as percentages, the phosphorus (P) concentration expressed in ppm and the weight percentage of sand, soil and clay for each different soil layer at specific depths expressed in centimetres.**

|         |            | Exchangeable basic cations and CEC |        |        |        |      |              |      |       |  |
|---------|------------|------------------------------------|--------|--------|--------|------|--------------|------|-------|--|
| Horizon | Depth      | Ca                                 | K      | Mg     | Na     | CEC  |              |      |       |  |
| Ah1     | 0-8/12     | 0.22                               | 0.10   | 0.14   | 0.01   | 7.10 |              |      |       |  |
| Ah2     | 8/12-19/38 | 0.34                               | 0.02   | 0.04   | 0.01   | 3.80 |              |      |       |  |
| AB      | 38-62      | 0.26                               | < 0.01 | 0.02   | < 0.01 | 4.10 |              |      |       |  |
| Bws1    | 62-110     | 0.29                               | 0.01   | 0.01   | < 0.01 | 3.30 |              |      |       |  |
| Bws2    | 110-136    | 0.52                               | < 0.01 | 0.01   | < 0.01 | 3.10 |              |      |       |  |
| Bws3    | 136-160+   | 0.21                               | < 0.01 | < 0.01 | < 0.01 | 2.60 |              |      |       |  |
|         |            | pH                                 |        |        |        |      | Soil texture |      |       |  |
| Horizon | Depth      | pH w                               | pH KCl | N      | C      | P    | Sand         | Silt | Clay  |  |
| Ah1     | 0-8/12     | 3.73                               | 3.52   | 0.15   | 2.09   | 7.09 | 66.54        | 2.49 | 30.97 |  |
| Ah2     | 8/12-19/38 | 4.26                               | 3.82   | 0.28   | 0.58   | 4.75 | 69.29        | 0.98 | 29.73 |  |
| AB      | 38-62      | 4.41                               | 3.85   | 0.21   | 0.45   | 3.95 | 62.64        | 1.25 | 36.11 |  |
| Bws1    | 62-110     | 4.43                               | 3.89   | 0.17   | 0.34   | 3.97 | 58.39        | 1.86 | 39.75 |  |
| Bws2    | 110-136    | 4.41                               | 3.84   | 0.13   | 0.26   | 2.41 | 59.16        | 1.89 | 38.96 |  |
| Bws3    | 136-160+   | 4.32                               | 3.88   | 0.11   | 1.12   | 2.53 | 60.86        | 0.62 | 38.52 |  |

**Table S3: Monthly accumulated rainfall from half hourly measurements with the amount of missing datapoints, monthly averaged air temperature (Temp) from hourly measurements, with the amount of missing datapoints, monthly averaged water filled pore space (WFPS) and monthly averaged soil temperature from hourly measurements, on 5 cm and 15 cm depth with the amount of missing data points.**

| Month          | Rainfall<br>(mm) | NA<br>30' | Temp<br>(°C) | NA<br>60' | WFPS_5<br>(%) | WFPS_15<br>(%) | Temp_5<br>(°C) | Temp_15<br>(°C) | NA<br>60' |
|----------------|------------------|-----------|--------------|-----------|---------------|----------------|----------------|-----------------|-----------|
| June 2022      | 69.40            | 187       | 23.83        | 93        | 22.87         | 16.91          | 23.94          | 24.05           | 99        |
| July 2022      | 127.31           | 74        | 23.58        | 36        | 30.67         | 22.22          | 23.70          | 23.84           | 261       |
| August 2022    | 167.67           | 19        | 23.33        | 52        | 30.32         | 21.60          | 23.53          | 23.64           | 0         |
| September 2022 | 237.91           | 45        | 23.65        | 7         | 29.03         | 20.41          | 23.72          | 23.75           | 0         |
| October 2022   | 176.73           | 291       | 23.60        | 518       | 31.16         | 22.21          | 23.58          | 23.68           | 449       |
| November 2022  | 325.63           | 145       | 23.13        | 422       | 36.88         | 25.00          | 23.58          | 23.66           | 362       |
| December 2022  | 41.43            | 912       | 23.09        | 479       | 31.42         | 20.76          | 23.45          | 23.53           | 81        |
| January 2023   | 76.03            | 0         | 23.64        | 0         | 22.47         | 15.81          | 23.86          | 23.90           | 23        |
| February 2023  | 64.39            | 9         | 24.29        | 4         | 20.27         | 14.99          | 24.16          | 24.16           | 196       |
| March 2023     | 205.25           | 54        | 23.58        | 23        | 29.13         | 22.41          | 24.03          | 24.09           | 192       |
| April 2023     | 163.20           | 251       | 23.75        | 0         | /             | /              | /              | /               | 720       |
| May 2023       | 54.65            | 0         | 24.91        | 202       | 18.57         | 13.48          | 25.20          | 25.06           | 492       |
| June 2023      | 162.20           | 257       | 23.57        | 43        | /             | /              | /              | /               | 720       |
| July 2023      | 98.14            | 17        | 23.85        | 1         | 29.79         | 21.46          | 24.32          | 24.46           | 440       |
| August 2023    | 90.93            | 30        | 23.62        | 32        | 27.85         | 19.48          | 24.17          | 24.32           | 28        |
| September 2023 | 103.03           | 0         | 23.75        | 7         | 30.41         | 21.71          | 24.23          | 24.38           | 0         |

**Table S4: Monthly accumulated soil CO<sub>2</sub> (g C m<sup>-2</sup>), CH<sub>4</sub> (mg C m<sup>-2</sup>) and N<sub>2</sub>O (mg N m<sup>-2</sup>) exchange from all 9 chambers. Days with no measurement were linearly interpolated if the gap was smaller than 10 consecutive days, otherwise the gap was not filled. All gaps in the CO<sub>2</sub> and CH<sub>4</sub> measurements were filled. An accumulated year budget for all three greenhouse gasses (CO<sub>2</sub> in Mg C ha<sup>-1</sup>, CH<sub>4</sub> in kg C ha<sup>-1</sup> and N<sub>2</sub>O in kg N ha<sup>-1</sup>) is calculated for all 12 consecutive months.**

| Month                       | CO <sub>2</sub><br>(g C m <sup>-2</sup> ) | CH <sub>4</sub><br>(mg C m <sup>-2</sup> ) | Gap<br>filled | N <sub>2</sub> O<br>(mg N m <sup>-2</sup> ) | Gap<br>filled | NA  |
|-----------------------------|-------------------------------------------|--------------------------------------------|---------------|---------------------------------------------|---------------|-----|
| June 2022                   | 114.3                                     | -21.0                                      | 8             | 53.7                                        | 8             | 0   |
| July 2022                   | 147.7                                     | -25.1                                      | 8             | 66.6                                        | 8             | 0   |
| August 2022                 | 131.3                                     | -30.2                                      | 1             | 44.7                                        | 1             | 0   |
| September 2022              | 128.3                                     | -27.7                                      | 2             | 33.7                                        | 1             | 0   |
| October 2022                | 133.8                                     | -24.9                                      | 17            | 30.2                                        | 18            | 0   |
| November 2022               | 129.5                                     | -21.0                                      | 2             | 30.8                                        | 8             | 0   |
| December 2022               | 121.0                                     | -35.4                                      | 4             | 22.1                                        | 4             | 0   |
| January 2023                | 116.8                                     | -52.4                                      | 0             | 8.9                                         | 0             | 0   |
| February 2023               | 100.6                                     | -29.0                                      | 2             | 10.5                                        | 3             | 1   |
| March 2023                  | 130.9                                     | -28.3                                      | 7             | /                                           | 0             | 31  |
| April 2023                  | 129.2                                     | -30.5                                      | 0             | /                                           | 0             | 30  |
| May 2023                    | 117.5                                     | -48.4                                      | 8             | /                                           | 0             | 31  |
| June 2023                   | 128.1                                     | -39.4                                      | 5             | 14.0                                        | 0             | 6   |
| July 2023                   | 141.9                                     | -30.5                                      | 5             | 19.0                                        | 5             | 0   |
| August 2023                 | 131.3                                     | -41.5                                      | 2             | 8.1                                         | 3             | 19  |
| September 2023              | 116.4                                     | -28.5                                      | 4             | 14.3                                        | 4             | 0   |
| Year                        | (Mg C ha <sup>-1</sup> )                  | (kg C ha <sup>-1</sup> )                   |               | (kg N ha <sup>-1</sup> )                    |               |     |
| June 2022-May 2023          | 15.0                                      | -3.7                                       | 59            | 3.0                                         | 51            | 93  |
| July 2022-June 2023         | 15.1                                      | -3.9                                       | 56            | 2.6                                         | 43            | 99  |
| August 2022-July 2023       | 15.1                                      | -4.0                                       | 53            | 2.1                                         | 40            | 99  |
| September 2022-August 2023  | 15.1                                      | -4.1                                       | 54            | 1.8                                         | 42            | 118 |
| October 2022-September 2023 | 15.0                                      | -4.1                                       | 56            | 1.6                                         | 45            | 118 |

**Table S5: The average of the daily means (337 days) of water filled pore space (WFPS, %) and temperature (Temp, °C) at 5 cm and 15 cm depth per sensor (  $mean_{min}^{max}$  ). Different letters point to statistical difference based on the Kruskal-Wallice test followed by the Wilcox test (Bonferroni adjusted p-value <0.05).**

|         | 1                                    | 2                                    | 3                                    | 4                                    | 5                                    | 6                                    | 7                                    | 8                                    | 9                                    |
|---------|--------------------------------------|--------------------------------------|--------------------------------------|--------------------------------------|--------------------------------------|--------------------------------------|--------------------------------------|--------------------------------------|--------------------------------------|
| WFPS_5  | 23.1 <sup>38.8</sup> <sub>14.8</sub> | 32.2 <sup>47.1</sup> <sub>16.4</sub> | 29.0 <sup>46.1</sup> <sub>19.0</sub> | 20.6 <sup>34.6</sup> <sub>11.3</sub> | 21.6 <sup>36.3</sup> <sub>12.6</sub> | 24.1 <sup>39.8</sup> <sub>13.9</sub> | 22.7 <sup>39.2</sup> <sub>14.2</sub> | 34.3 <sup>54.3</sup> <sub>14.7</sub> | 43.7 <sup>69.1</sup> <sub>18.0</sub> |
|         | AB                                   | C                                    | D                                    | E                                    | EF                                   | A                                    | BF                                   | G                                    | H                                    |
| WFPS_15 | 12.3 <sup>23.6</sup> <sub>7.0</sub>  | 23.3 <sup>34.0</sup> <sub>13.5</sub> | 22.9 <sup>33.4</sup> <sub>14.9</sub> | 22.2 <sup>33.5</sup> <sub>13.8</sub> | 14.6 <sup>24.4</sup> <sub>7.23</sub> | 27.9 <sup>41.9</sup> <sub>18.9</sub> | 11.6 <sup>21.6</sup> <sub>6.5</sub>  | 18.3 <sup>28.3</sup> <sub>9.8</sub>  | 25.6 <sup>42.0</sup> <sub>12.1</sub> |
|         | A                                    | B                                    | BC                                   | C                                    | D                                    | E                                    | A                                    | F                                    | G                                    |
| Temp_5  | 23.9 <sup>25.8</sup> <sub>21.9</sub> | 23.6 <sup>25.8</sup> <sub>21.9</sub> | 23.9 <sup>25.8</sup> <sub>21.7</sub> | 24.0 <sup>25.8</sup> <sub>22.0</sub> | 24.0 <sup>25.7</sup> <sub>21.9</sub> | 23.9 <sup>25.9</sup> <sub>21.9</sub> | 24.1 <sup>26.1</sup> <sub>21.9</sub> | 23.8 <sup>25.8</sup> <sub>21.7</sub> | 24.2 <sup>26.0</sup> <sub>21.9</sub> |
|         | AB                                   | C                                    | ADE                                  | DFG                                  | AF                                   | ABG                                  | F                                    | BE                                   | /                                    |
| Temp_15 | 23.9 <sup>25.7</sup> <sub>22.1</sub> | 23.2 <sup>25.6</sup> <sub>22.2</sub> | 23.9 <sup>25.4</sup> <sub>22.0</sub> | 24.0 <sup>25.5</sup> <sub>22.2</sub> | 24.0 <sup>25.7</sup> <sub>21.9</sub> | 24.0 <sup>25.5</sup> <sub>22.3</sub> | 24.2 <sup>25.6</sup> <sub>22.3</sub> | 23.8 <sup>25.5</sup> <sub>21.9</sub> | 24.4 <sup>25.9</sup> <sub>21.3</sub> |
|         | A                                    | B                                    | A                                    | A                                    | A                                    | A                                    | C                                    | B                                    | D                                    |

**Table S6: Soil CO<sub>2</sub> (mg C m<sup>-2</sup> h<sup>-1</sup>), CH<sub>4</sub> (μg C m<sup>-2</sup> h<sup>-1</sup>) and N<sub>2</sub>O (μg N m<sup>-2</sup> h<sup>-1</sup>) exchange during the whole measurement period for each automated chamber separately showing the mean with standard deviation (*mean* ± *SD*) followed by the coefficient of variation (CV) and the median with the minimum and maximum value (*median*<sub>min</sub><sup>max</sup>). The last row ‘All chambers’ indicates the average of the 9 mean values together with its standard deviation and CV. The first column indicates the chamber number, the fourth column indicates the amount of CO<sub>2</sub> and CH<sub>4</sub> data points and the sixth column indicates the amount of N<sub>2</sub>O data points.**

| Chamber<br>Collar | CO <sub>2</sub><br>(mg C m <sup>-2</sup> h <sup>-1</sup> )     | CH <sub>4</sub><br>(μg C m <sup>-2</sup> h <sup>-1</sup> )       | #meas | N <sub>2</sub> O<br>(μg N m <sup>-2</sup> h <sup>-1</sup> ) | #meas |
|-------------------|----------------------------------------------------------------|------------------------------------------------------------------|-------|-------------------------------------------------------------|-------|
| Chamber 1         | 151.8 ± 20.0                                                   | -49.5 ± 56.9                                                     | 1048  | 32.8 ± 25.4                                                 | 655   |
| 1                 | CV: 0.13<br>150.2 <sub>91</sub> <sup>262</sup>                 | CV: 1.15<br>-60.33 <sub>-106</sub> <sup>398</sup>                |       | CV: 0.78<br>26.2 <sub>6</sub> <sup>143</sup>                |       |
| 2                 | 167.2 ± 23.2<br>CV: 0.14<br>166.9 <sub>73</sub> <sup>246</sup> | -45.7 ± 39.0<br>CV: 0.85<br>-56.2 <sub>-102</sub> <sup>253</sup> | 1206  | 48.0 ± 58.3<br>CV: 1.21<br>23.4 <sub>7</sub> <sup>347</sup> | 823   |
| Chamber 2         | 140.9 ± 24.6                                                   | -63.6 ± 38.8                                                     | 1327  | 28.8 ± 27.1                                                 | 991   |
| 1                 | CV: 0.17<br>137.9 <sub>50</sub> <sup>232</sup>                 | CV: 0.61<br>-72.9 <sub>-131</sub> <sup>107</sup>                 |       | CV: 0.94<br>17.1 <sub>6</sub> <sup>163</sup>                |       |
| 2                 | 134.2 ± 24.9<br>CV: 0.19<br>134.8 <sub>37</sub> <sup>204</sup> | -35.0 ± 84.4<br>CV: 2.41<br>-47.7 <sub>-120</sub> <sup>539</sup> | 1497  | 41.7 ± 87.9<br>CV: 2.11<br>14.6 <sub>7</sub> <sup>842</sup> | 1233  |
| Chamber 3         | 149.0 ± 24.3                                                   | -52.5 ± 55.1                                                     | 1519  | 39.2 ± 29.1                                                 | 1077  |
| 1                 | CV: 0.16<br>153.3 <sub>56</sub> <sup>231</sup>                 | CV: 1.05<br>-69.1 <sub>-129</sub> <sup>197</sup>                 |       | CV: 0.74<br>31.0 <sub>3</sub> <sup>184</sup>                |       |
| 2                 | 158.5 ± 23.6<br>CV: 0.15<br>158.5 <sub>57</sub> <sup>294</sup> | -80.5 ± 27.2<br>CV: 0.34<br>-81.1 <sub>-126</sub> <sup>200</sup> | 1535  | 38.3 ± 33.8<br>CV: 0.88<br>28.3 <sub>3</sub> <sup>227</sup> | 1164  |

|           |                                                      |                                                        |      |                                               |      |
|-----------|------------------------------------------------------|--------------------------------------------------------|------|-----------------------------------------------|------|
| Chamber 4 | $170.2 \pm 26.0$                                     | $-24.6 \pm 81.1$                                       | 1397 | $32.6 \pm 24.8$                               | 1046 |
| 1         | CV: 0.15<br>$168.3^{277}_{68}$                       | CV: 3.30<br>$-44.5^{550}_{-103}$                       |      | CV: 0.76<br>$22.9^{141}_4$                    |      |
| 2         | $186.5 \pm 26.3$<br>CV: 0.14<br>$184.8^{302}_{65}$   | $-19.8 \pm 108.3$<br>CV: 5.51<br>$-34.2^{1209}_{-102}$ | 1424 | $38.9 \pm 31.8$<br>CV: 0.82<br>$29.0^{216}_6$ | 1108 |
| Chamber 5 | $169.9 \pm 26.8$                                     | $-85.0 \pm 20.0$                                       | 1519 | $54.6 \pm 63.0$                               | 1076 |
| 1         | CV: 0.16<br>$168.6^{291}_{61}$                       | CV: 0.23<br>$-88.1^{-32}_{-133}$                       |      | CV: 1.15<br>$22.7^{309}_5$                    |      |
| 2         | $211.9 \pm 29.1$<br>CV: 0.14<br>$211.4^{333}_{81}$   | $-51.3 \pm 59.2$<br>CV: 1.15<br>$-65.2^{272}_{-132}$   | 1627 | $63.4 \pm 44.7$<br>CV: 0.71<br>$44.9^{235}_9$ | 1216 |
| Chamber 6 | $154.7 \pm 23.3$                                     | $-20.5 \pm 49.8$                                       | 2765 | $36.7 \pm 39.0$                               | 1969 |
|           | CV: 0.15<br>$154.6^{254}_{52}$                       | CV: 2.43<br>$-29.3^{577}_{-84}$                        |      | CV: 1.06<br>$17.1^{284}_3$                    |      |
| Chamber 7 | $263.1 \pm 44.5$                                     | $-19.2 \pm 39.1$                                       | 1155 | $50.1 \pm 40.3$                               | 935  |
| 1         | CV: 0.17<br>$259.3^{429}_{105}$                      | CV: 2.04<br>$-27.1^{290}_{-74}$                        |      | CV: 0.81<br>$37.0^{228}_5$                    |      |
| 2         | $261.5 \pm 50.5$<br>CV: 0.19<br>$258.2^{463}_{91.6}$ | $-11.8 \pm 70.5$<br>CV: 5.98<br>$-29.5^{469}_{-81}$    | 1329 | $65.4 \pm 81.9$<br>CV: 1.25<br>$25.0^{424}_7$ | 1103 |

|              |                                                        |                                                          |      |                                                     |      |
|--------------|--------------------------------------------------------|----------------------------------------------------------|------|-----------------------------------------------------|------|
| Chamber 8    | $132.4 \pm 19.5$                                       | $-64.4 \pm 16.7$                                         | 1368 | $25.4 \pm 17.6$                                     | 942  |
| 1            | CV: 0.15<br>$133.4 \frac{232}{60}$                     | CV: 0.26<br>$-65.0 \frac{19}{-106}$                      |      | CV: 0.69<br>$20.6 \frac{127}{5}$                    |      |
| 2            | $124.4 \pm 15.6$<br>CV: 0.13<br>$123.8 \frac{220}{53}$ | $-62.8 \pm 38.0$<br>CV: 0.61<br>$-68.2 \frac{255}{-120}$ | 1572 | $22.9 \pm 16.1$<br>CV: 0.70<br>$18.9 \frac{85}{3}$  | 1165 |
| Chamber 9    | $224.0 \pm 49.0$                                       | $-40.6 \pm 24.4$                                         | 1351 | $36.0 \pm 22.1$                                     | 969  |
| 1            | CV: 0.22<br>$232.1 \frac{406}{76}$                     | CV: 0.60<br>$-43.1 \frac{62}{-100}$                      |      | CV: 0.61<br>$27.8 \frac{131}{5}$                    |      |
| 2            | $201.1 \pm 47.1$<br>CV: 0.23<br>$186.1 \frac{439}{46}$ | $-41.5 \pm 32.7$<br>CV: 0.79<br>$-48.0 \frac{157}{-98}$  | 1570 | $37.8 \pm 21.0$<br>CV: 0.56<br>$33.9 \frac{148}{6}$ | 1163 |
| All chambers | $176.6 \pm 42.6$<br>CV: 0.24                           | $-45.2 \pm 21.8$<br>CV: 0.48                             | /    | $40.7 \pm 12.1$<br>CV: 0.30                         | /    |



**Table S7: The linear mixed effect model fitted on the CO<sub>2</sub> fluxes (mg C m<sup>-2</sup> h<sup>-1</sup>) followed by the fixed effects of water filled pore space (WFPS, %), soil temperature (Temp<sub>soil</sub>, °C), air temperature (Temp<sub>air</sub>, °C), precipitation (Rain, mm) and the accumulated precipitation in the previous 10 days (PrevRain<sub>10days</sub>, mm) in absolute value (not relative change), the t-values, the partial R<sup>2</sup> (%) and the variance of inflation factor (VIF) of the fixed factors and the conditional and marginal R<sup>2</sup> (%) of the model. The chamber number with collar is used as random intercept and an autoregressive model of order one is included to account for the temporal correlation in the data (CorAR1).**

$$\log(Flux_{CO_2}) \sim WFPS + Temp_{soil} + Temp_{air} + Rain + PrevRain_{10days} + (1|ChamberID) + CorAR1$$

|                            | Fixed effect size | t-value | Partial R <sup>2</sup> | VIF |
|----------------------------|-------------------|---------|------------------------|-----|
| WFPS                       | 0.0084            | 25.5    | 0.05                   | 1.5 |
| Temp <sub>soil</sub>       | 0.0681            | 36.1    | 0.07                   | 1.2 |
| Temp <sub>air</sub>        | 0.0184            | 46.6    | 0.04                   | 1.0 |
| Rain                       | 0.0059            | 7.6     | 0.01                   | 1.0 |
| PrevRain <sub>10days</sub> | 0.0009            | 12.5    | 0                      | 1.3 |
|                            |                   |         |                        |     |
| Conditional R <sup>2</sup> | 0.79              |         |                        |     |
| Marginal R <sup>2</sup>    | 0.13              |         |                        |     |

**Table S8: The linear mixed effect model fitted on the CH<sub>4</sub> fluxes (µg C m<sup>-2</sup> h<sup>-1</sup>) followed by the fixed effects of water filled pore space (WFPS, %), air temperature (Temp<sub>air</sub>, °C) and the accumulated precipitation in the previous 10 days (PrevRain<sub>10days</sub>, mm) in absolute value (not relative change), the t-values and the partial R<sup>2</sup> and the variance of inflation factor (VIF) of the fixed factors and the conditional and marginal R<sup>2</sup> of the model. The chamber number with collar is used as random intercept and an autoregressive model of order one is included to account for the temporal correlation in the data (CorAR1).**

$$\log(Flux_{CH_4} + min) \sim WFPS + Temp_{air} + PrevRain_{10days} + (1|ChamberID) + CorAR1$$

|                            | Fixed effect size | t-value | Partial R <sup>2</sup> | VIF |
|----------------------------|-------------------|---------|------------------------|-----|
| WFPS                       | 0.0061            | 11.4    | 0.02                   | 1.2 |
| Temp <sub>air</sub>        | -0.0045           | -8.0    | 0.01                   | 1.0 |
| PrevRain <sub>10days</sub> | 0.0022            | 13.1    | 0.02                   | 1.3 |
|                            |                   |         |                        |     |
| Conditional R <sup>2</sup> | 0.35              |         |                        |     |
| Marginal R <sup>2</sup>    | 0.05              |         |                        |     |

**Table S9: The linear mixed effect model fitted on the N<sub>2</sub>O (μg N m<sup>-2</sup> h<sup>-1</sup>) fluxes followed by the fixed effects of water filled pore space (WFPS, %), soil temperature (Temp<sub>soil</sub>, °C), air temperature (Temp<sub>air</sub>, °C) and the accumulated precipitation in the previous 10 days (PrevRain<sub>10days</sub>, mm) in absolute value (not relative change), the t-values and the partial R<sup>2</sup> and the variance of inflation factor (VIF) of the fixed factors and the conditional and marginal R<sup>2</sup> of the model. The chamber number with collar is used as random intercept and an autoregressive model of order one is included to account for the temporal correlation in the data (CorAR1).**

$$\log(Flux_{N_2O}) \sim WFPS + Temp_{soil} + Temp_{air} + PrevRain_{10days} + (1|ChamberID) + CorAR1$$

|                            | Fixed effect size | t-value | Partial R <sup>2</sup> | VIF |
|----------------------------|-------------------|---------|------------------------|-----|
| WFPS                       | 0.0285            | 37.5    | 0.05                   | 1.4 |
| Temp <sub>soil</sub>       | 0.0895            | 22.9    | 0.02                   | 1.1 |
| Temp <sub>air</sub>        | 0.0193            | 25.9    | 0.01                   | 1.0 |
| PrevRain <sub>10days</sub> | 0.0034            | 16.0    | 0.01                   | 1.3 |
|                            |                   |         |                        |     |
| Conditional R <sup>2</sup> | 0.22              |         |                        |     |
| Marginal R <sup>2</sup>    | 0.12              |         |                        |     |

To look into the effect of the high sampling frequency of the set-up, a resampling procedure was carried out to simulate lower sampling frequencies with the same number of chambers. For this resampling only daytime measurements were used. The resampling scenarios were: **a)** one measurement per chamber every month, **b)** one measurement per chamber every week, and **c)** one measurement per chamber every day. Using a bootstrapping procedure (size 1000), one measurement per chamber is randomly selected out of the subset per period (month, week or day) of the data of the whole measurement period. The mean of the nine chambers was calculated per period (month, week or day) and then the average of all periods was taken as GHG budget. The budget of scenario **a** is the average of 16 measurements per chamber, scenario **b** has 69 measurements per chamber for CO<sub>2</sub> and CH<sub>4</sub> and 56 for N<sub>2</sub>O and scenario **c** has 380 measurements per chamber for CO<sub>2</sub> and CH<sub>4</sub> and 270 for N<sub>2</sub>O. In Table S10, the mean together with the minimum and maximum of the 1000 GHG budgets can be found, as well as the interquartile range (IQR) and the normalized interquartile range (NIQR), which is calculated as the IQR divided by the mean, multiplied with 100. In Fig. S8, the distribution of these bootstraps can be found.

**Table S10:** For each greenhouse gas, CO<sub>2</sub> (mg C m<sup>-2</sup> h<sup>-1</sup>), CH<sub>4</sub> (μg C m<sup>-2</sup> h<sup>-1</sup>) and N<sub>2</sub>O (μg N m<sup>-2</sup> h<sup>-1</sup>), the average, the minimum and maximum (*mean<sup>maximum</sup>*/*minimum*) greenhouse gas budget of the 1000 bootstraps, together with the interquartile range (IQR) and the normalized interquartile range (NIQR, %) for each scenario.

|            | CO <sub>2</sub>                     | CH <sub>4</sub>                     | N <sub>2</sub> O                 |
|------------|-------------------------------------|-------------------------------------|----------------------------------|
| Scenario a | 176.0 <sup>192</sup> <sub>159</sub> | -44.2 <sup>2</sup> <sub>-59</sub>   | 40.0 <sup>62</sup> <sub>29</sub> |
|            | IQR = 7.2 NIQR= 0.04                | IQR = 8.5 NIQR= 0.19                | IQR = 5.5 NIQR= 0.13             |
| Scenario b | 176.2 <sup>185</sup> <sub>169</sub> | -45.2 <sup>-34</sup> <sub>-54</sub> | 39.3 <sup>47</sup> <sub>33</sub> |
|            | IQR = 3.5 NIQR= 0.02                | IQR = 4.1 NIQR= 0.09                | IQR = 2.7 NIQR= 0.07             |
| Scenario c | 175.9 <sup>179</sup> <sub>173</sub> | -44.7 <sup>-41</sup> <sub>-48</sub> | 40.3 <sup>44</sup> <sub>38</sub> |
|            | IQR = 1.3 NIQR= 0.01                | IQR = 1.3 NIQR= 0.03                | IQR = 1.1 NIQR= 0.03             |
